# Supplementary material for: Vaccinia virus D10 has broad decapping activity that is regulated by mRNA splicing
Source: PLoS Pathog. 2022 Feb 24;18(2):e1010099. doi: 10.1371/journal.ppat.1010099 (PMC8903303; doi:10.1371/journal.ppat.1010099)
Supplement: S3 Table — (XLSX) [file ppat.1010099.s010.xlsx]

## Sheet: Sheet1
S3 Table. Oligos used in this study.
RT-qPCR primers
Target gene	Forward primer	Reverse primer
18S	GTAACCCGTTGAACCCCATT	CCATCCAATCGGTAGTAGCG
Adv-VAI	TGGTCTGGTGGATAAATTCG	GTTGTCTGACGTCGCACA
B2 SINE	GGGGCTGGAGAGATGGCT	CCATGTGGTTGCTGGGAT
ACTB	CATGTACGTTGCTATCCAGGC	CTCCTTAATGTCACGCACGAT
GAPDH	CAACGGATTTGGTCGTATTGG	GCAACAATATCCACTTTACCAGAGTTAA
EEF1A1	TGTCGTCATTGGACACGTAGA	ACGCTCAGCTTTCAGTTTATCC
7SK	CCCCTGCTAGAACCTCCAAAC	CACATGCAGCGCCTCATTT
ERCC8	AAGGCAGTTTGCGCTAATGC	TGAGGCAGGATTTGGTCATACC
GBE1	AGTCGCTGGCATTTTGGTTG	AAGCCCATGCGTAATGAGTC
GJA1	CAACAAGCAAGCAAGTGAGC	ATCAAAAGGCTGTGCATGGG
DDX28	TCGTGACAGAGCAGAAAGGAC	TCATCAAGGCTGGCATTTGC
CCDC8	ACAACTGACGAATGCTCTGG	ATGGCAAGCGAAGTGACAAC
ZNF830	AAGAATTGCGGCGGTTAATGA	CCCAAACGGTTGTACTTCGC
D10	CCGAATTCAGGTAATGGACTCC	TGGCCATAACATTTGAGTTTTGC
IFNL2	TGTCACCTTCAACCTCTTCCG	TCTCAGGTTGCATGACTGGTG
Oligos used for cloning
Name	Sequence	Description
pCDNA4-3xFLAG-D10_Fw	GACAAGGGGGCGGCCGCTATGAACTTTTACAGATCTAGTATA	Forward primer to amplify D10 and clone into NotI-digested pCDNA4 vector to generate N-terminal 3xFLAG D10 via InFusion reaction
pCDNA4-3xFLAG-D10_Rv	TAGACTCGAGCGGCCGCTCAATCATCCTCAGTTAATTTTTT	Reverse primer to amplify D10 and clone into NotI-digested pCDNA4 vector to generate N-terminal 3xFLAG D10 via InFusion reaction
pLVX-3xFLAG-D10_Fw	gtatacaccggtATGGACTACAAGGACCACGACGGCGAC	Forward primer to amplify 3xFLAG tag to generate pLVX-3xFLAG-D10 via InFusion reaction with products from pLVX-backbone_Fw and pLVX-backbone_Rv
pLVX-3xFLAG-D10_Rv	GTTCATgccgccgccCTTGTCGTCGTCGTCCTTGTAGTC	Reverse primer to amplify 3xFLAG tag to generate pLVX-3xFLAG-D10 via InFusion reaction with products from pLVX-backbone_Fw and pLVX-backbone_Rv
pLVX-backbone_Fw	GACGACGACGACAAGggcggcggcATGAACTTTTACAGA	Forward primer to amplify pLVX backbone to generate pLVX-3xFLAG-D10 via InFusion reaction with products from pLVX-3xFLAG-D10_Fw and pLVX-3xFLAG-D10_Rv
pLVX-backbone_Rv	GTGGTCCTTGTAGTCCATaccggtgtatacgggaattct	Reverse primer to amplify pLVX backbone to generate pLVX-3xFLAG-D10 via InFusion reaction with products from pLVX-3xFLAG-D10_Fw and pLVX-3xFLAG-D10_Rv
D10 E144Q/E145Q	TCCAGGGAAATTAAACAACAAGTTAATATAGACAAT	Mutagenesis primer to generate D10 E144Q/E145Q
